# Supplementary material for: SUMOylation of PDPK1 Is required to maintain glycolysis-dependent CD4 T-cell homeostasis
Source: PubMed Central journal article supplement (PMC8873481; doi:10.1038/s41419-022-04622-1), 2022-02-24

Figure 5A, Western Blot Bands :

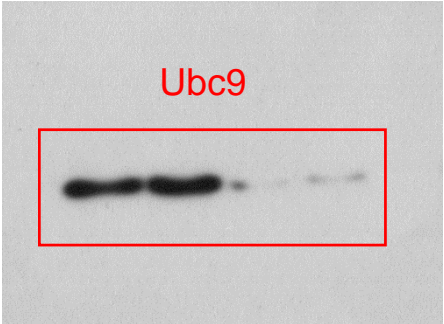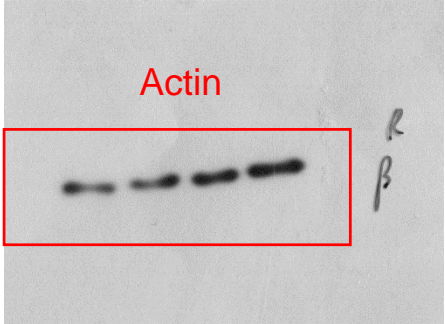

Figure 5B, Western Blot Bands :

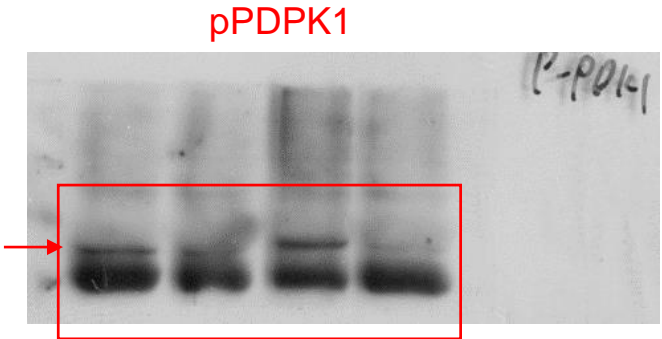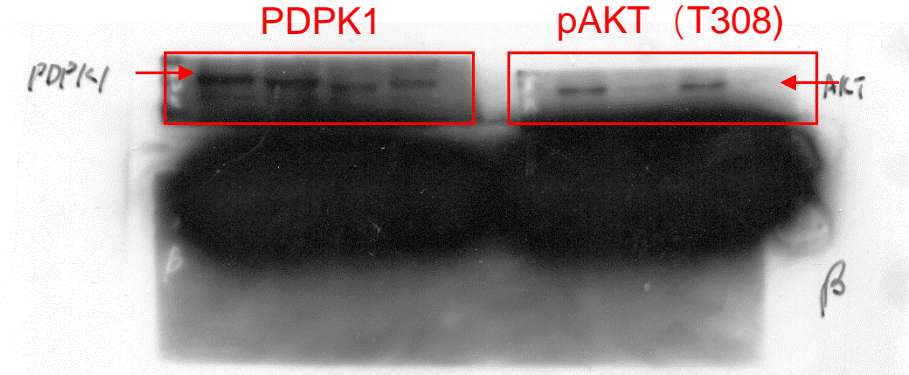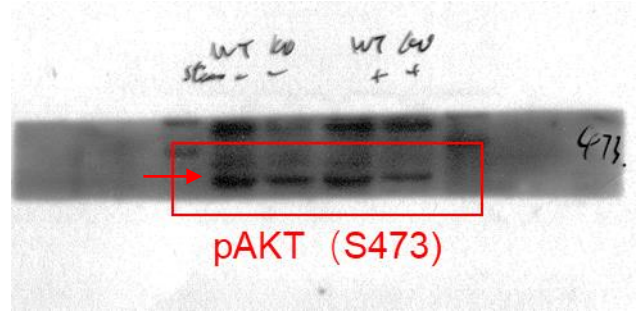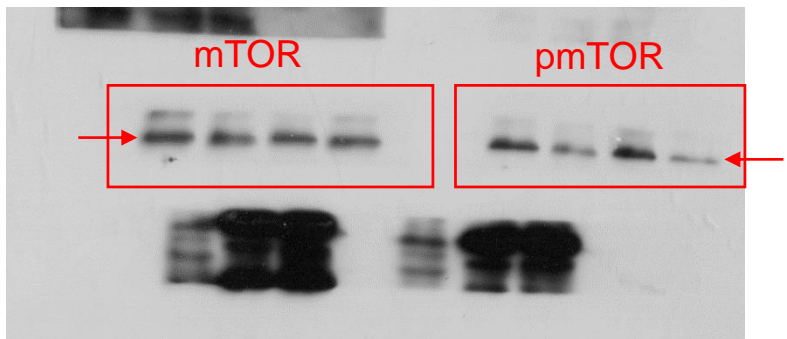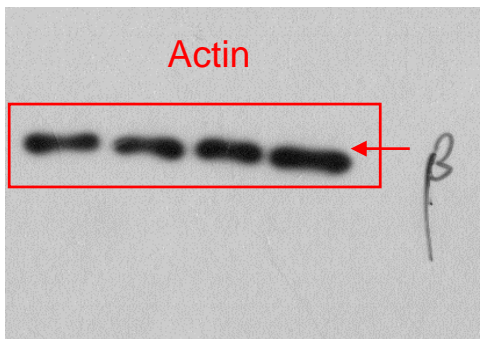

Figure 7A, Western Blot Bands :

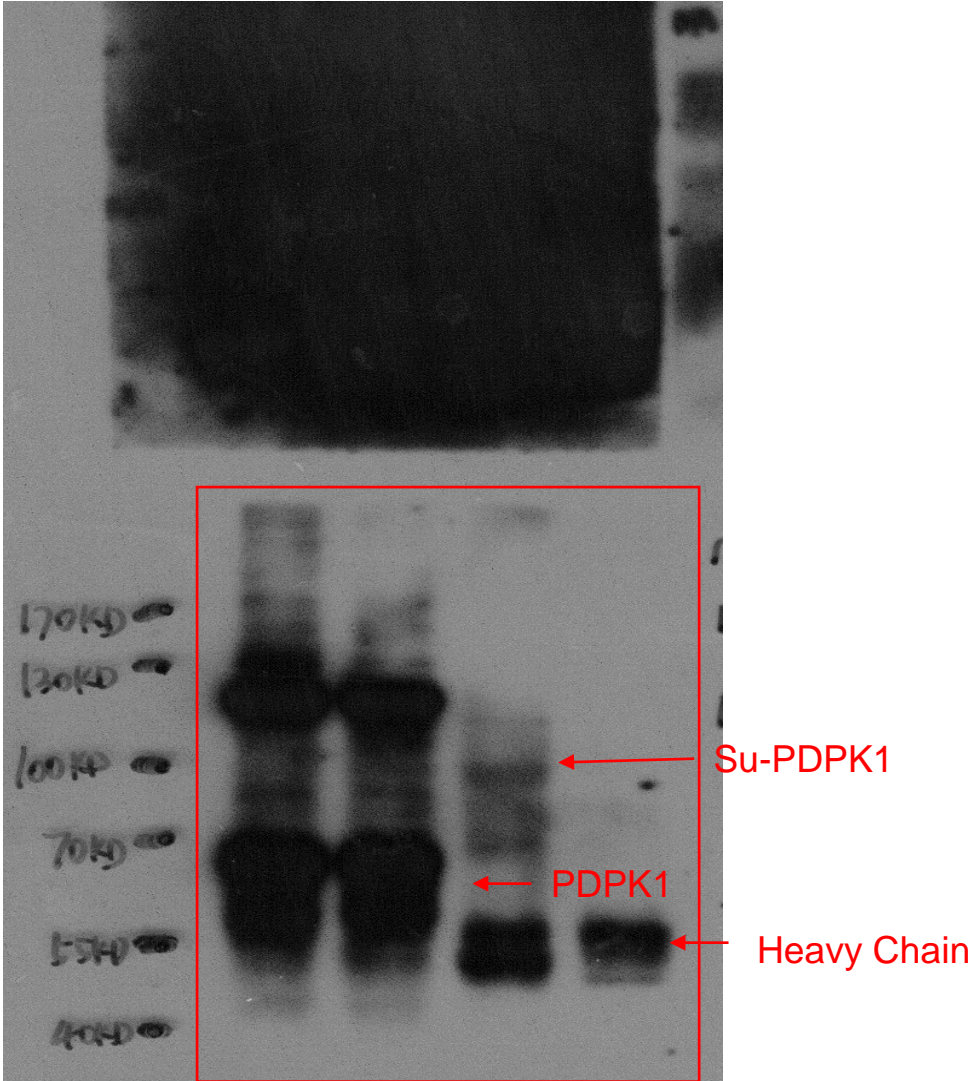

Figure 7C, Western Blot Bands :

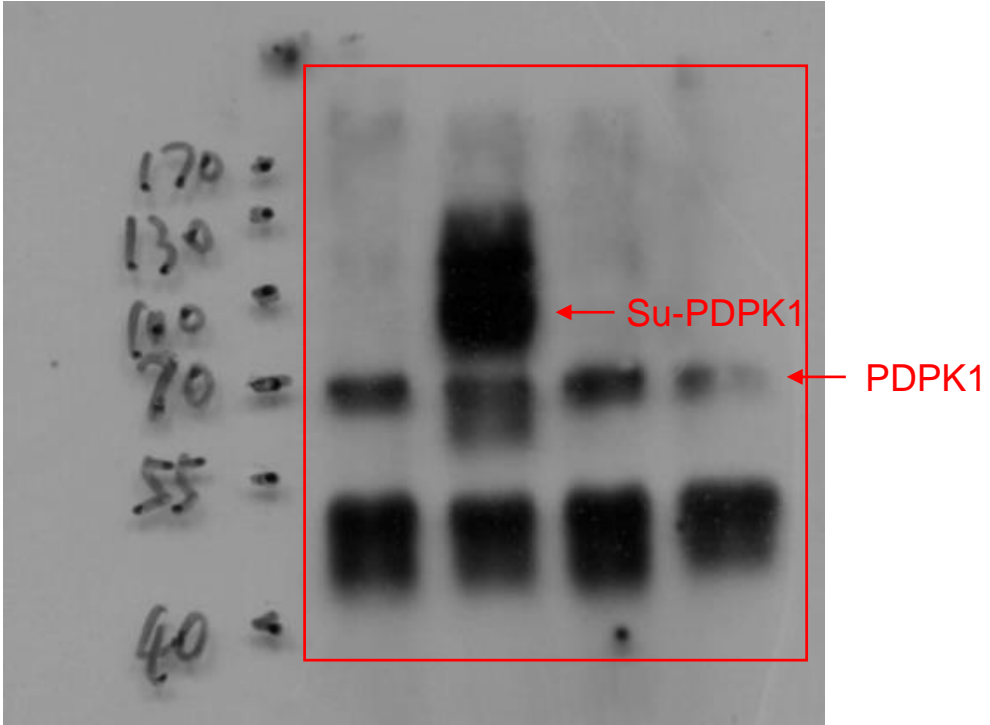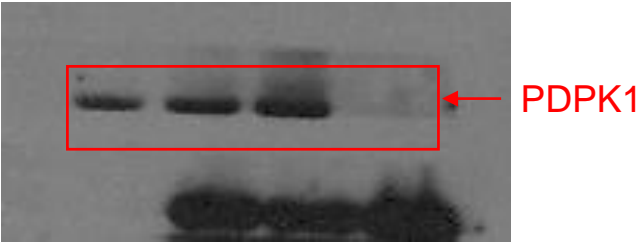

Figure 7D, Western Blot Bands :

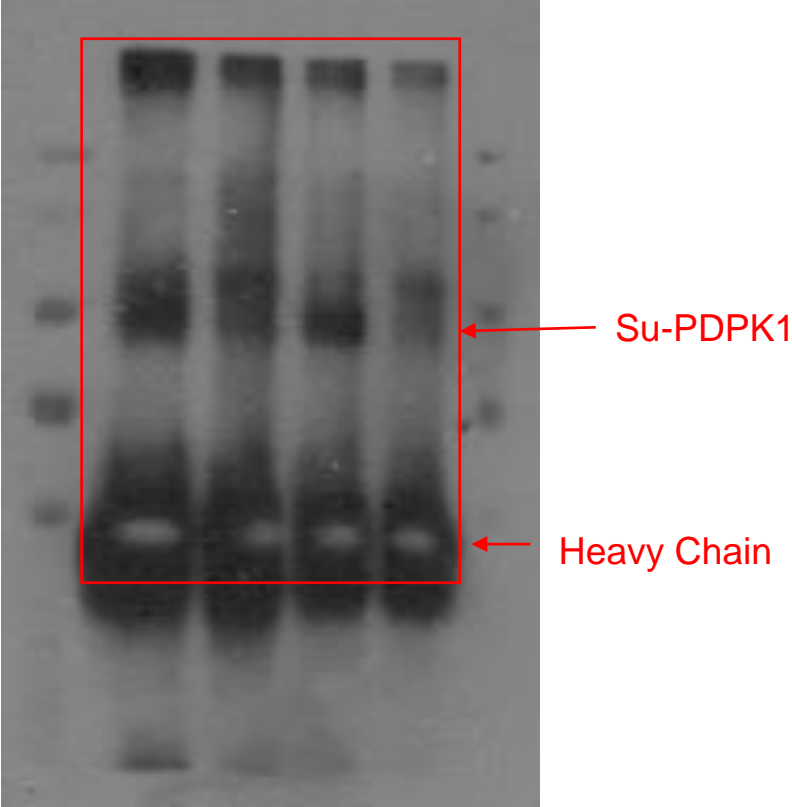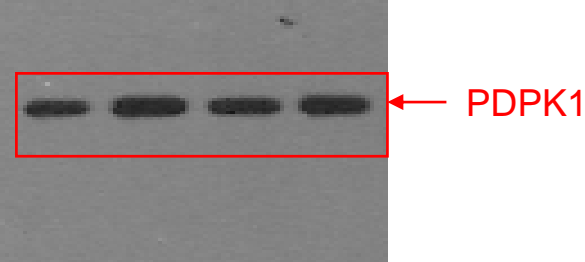

Figure 7E, Western Blot Bands :

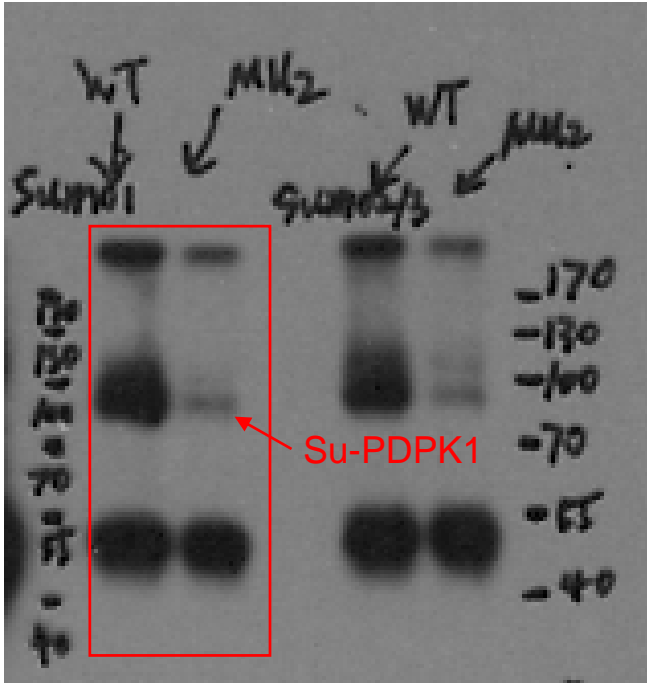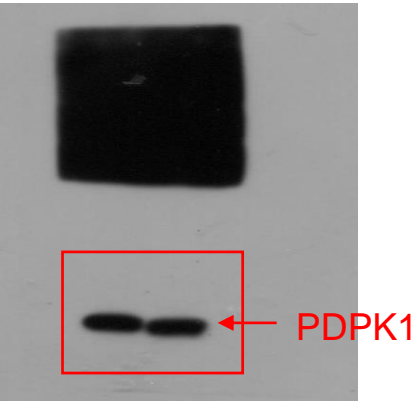

Figure 7A, Western Blot Bands :

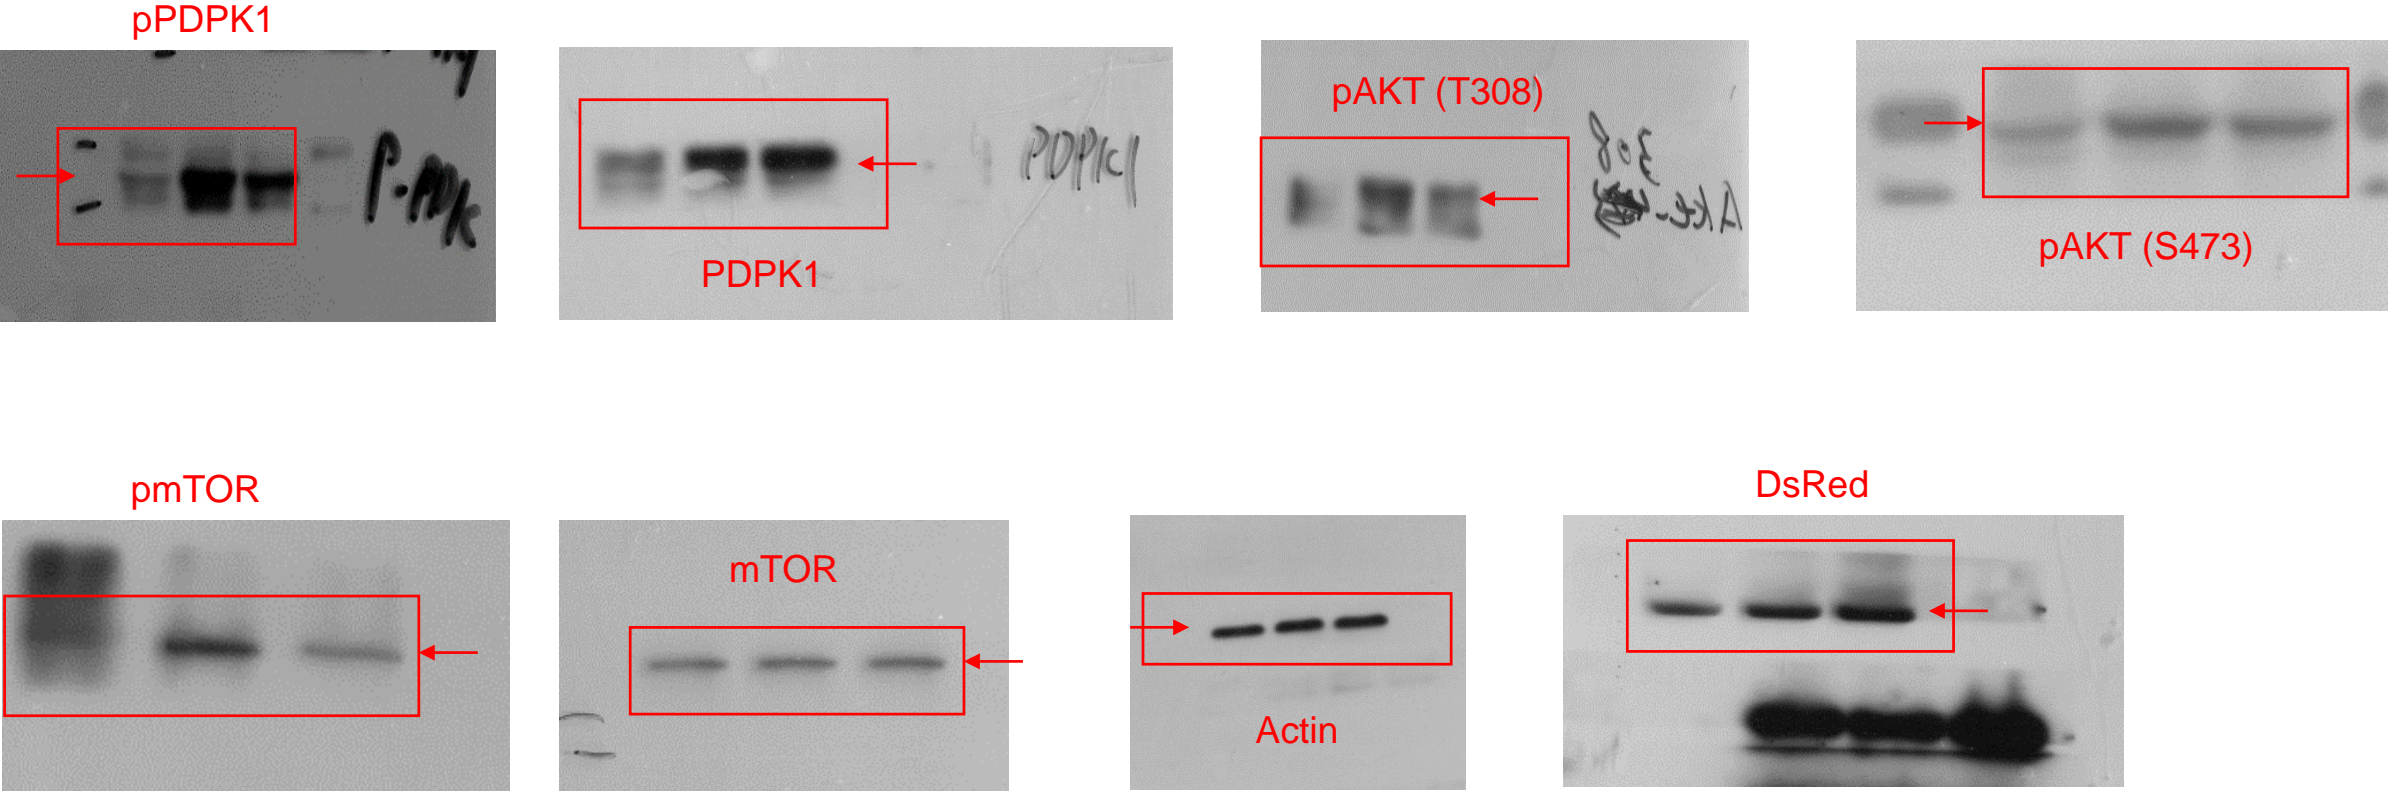

Supplement: 41419_2022_4622_MOESM9_ESM.pdf [file 41419_2022_4622_MOESM9_ESM.pdf]
